# Supplementary material for: Solvation strategies for free-energy calculations in a halogen-bonded complex: implicit, explicit, and machine learning approaches
Source: Royal Society of Chemistry journal article supplement (doi:10.1039/d5sc06336a), 2025-01-01
Supplement: d5sc06336a1.pdf [file d5sc06336a1.pdf]

## Supplementary material for the paper:

### Solvation Strategies for Free-Energy Calculations in Halogen-Bonded Complex: Implicit, Explicit, and Machine Learning Approaches

Jaroslav Vacek,<sup>a,b,c</sup> Dávid Vrška,<sup>a,d</sup> Debashree Manna,<sup>\*a</sup> Rabindranath Lo,<sup>\*a</sup> Pavel Hobza<sup>\*a,b</sup>

<sup>a</sup>Institute of Organic Chemistry and Biochemistry, Czech Academy of Sciences, Flemingovo náměstí 542/2, 160 00 Prague, Czech Republic. Email: debashree.manna@uochb.cas.cz; rabindranath.lo@uochb.cas.cz; pavel.hobza@uochb.cas.cz

<sup>b</sup>IT4Innovations, VŠB-Technical University of Ostrava, 17. listopadu 2172/15, 708 00 Ostrava-Poruba, Czech Republic.

<sup>c</sup>Faculty of Science, Palacký University Olomouc, 17. listopadu 1192/12 779 00 Olomouc, Czech Republic.

<sup>d</sup>Department of Physical and Theoretical Chemistry, Faculty of Natural Sciences, Comenius University in Bratislava, Mlynská dolina, Ilkovičova 6, 842 15 Bratislava, Slovakia.

**Table S1** Cell volumes ( $a \times b \times c$ ) used in molecular dynamics simulations for each investigated solvent in both bound and separated states. Values are given in Ångströms and rounded to two decimal places.

| Solvent              | State     | a                   | b                   | c                   |
|----------------------|-----------|---------------------|---------------------|---------------------|
| Carbon tetrachloride | bound     | 15.22, 0.00, 0.00   | −0.11, 15.15, 0.00  | −0.06, −0.03, 15.20 |
| Carbon tetrachloride | separated | 15.93, −1.33, −1.15 | −0.12, 16.47, 1.01  | −0.07, −0.03, 16.37 |
| Dichloromethane      | bound     | 13.96, 0.00, 0.00   | 0.22, 14.75, 0.00   | −0.24, −2.08, 14.08 |
| Dichloromethane      | separated | 13.32, −0.12, −2.08 | 0.23, 14.18, −0.99  | −0.25, −2.21, 14.96 |
| Methanol             | bound     | 12.37, −1.14, 0.94  | −0.05, 12.12, −2.41 | −0.11, −0.25, 13.22 |
| Methanol             | separated | 12.83, −1.30, 0.33  | −1.32, 11.95, −0.19 | 0.90, −2.74, 12.89  |

**Table S2** Number of configurations ( $N_{data}$ ) generated by molecular dynamics using the PBE-D3(BJ) functional, and equilibration period ( $\tau$ ) for each investigated solvent, for both bound and separated (in parentheses) states as determined via Mann-Kendall tests.

| Solvent              | $N_{data}$    | $\tau$        |
|----------------------|---------------|---------------|
| Carbon tetrachloride | 60000 (86436) | 5000 (35000)  |
| Dichloromethane      | 80000 (60000) | 30000 (10000) |
| Methanol             | 80000 (80000) | 0 (0)         |

To minimize errors in ML predictions, we optimized two ML hyperparameters (HPs), namely  $\sigma$  in Gaussians representing the atomic density  $\rho$  centered at positions  $x_j$  in the atomic environment

$$\rho_{\chi_i^A}(r) = \sum_{j \in \chi_i^A} \exp \left\{ -\frac{(r - x_j)^2}{2\sigma^2} \right\} \quad (\text{Eq. S1})$$

and the regularization parameter  $\lambda$  used in kernel ridge regression:

$$\mathbf{w} = (\mathbf{K}_{train} + \lambda \mathbf{I})^{-1} \mathbf{y}_{train} \quad (\text{Eq. S2})$$

$$\mathbf{y}_{predict} = \mathbf{K}_{predict} \mathbf{w}, \quad (\text{Eq. S3})$$

where  $\mathbf{y}_{train}$  and  $\mathbf{y}_{predict}$  are the vectors of labels of configurations for the training and prediction sets,  $\mathbf{K}_{train}$  and  $\mathbf{K}_{predict}$  denote the kernel matrices for the training and predicted configurations,  $\mathbf{I}$  is the identity matrix and  $\mathbf{w}$  is the vector of weights used to make predictions of the target labels  $\mathbf{y}_{predict}$ . HP optimization was performed separately for the R and P configurations, for each method and each solvent – multiple combinations of  $\sigma$  and  $\lambda$  were tested for each model independently. To search for the optimal HPs, we employed a leave-one-out cross-validation procedure.<sup>S1</sup>

**Table S3** Hyperparameters  $\sigma$  and  $\lambda$  yielding optimal RMSE errors (see Table S4), obtained using the leave-one-out cross-validation technique for each investigated target functional in each solvent, for both bound and separated (in parentheses) states.

| method               | HSE06-D3(BJ)  |                                         | PBE0-D3(BJ)   |                                         |
|----------------------|---------------|-----------------------------------------|---------------|-----------------------------------------|
| solvent              | $\sigma$ [Å]  | $\lambda$ [eV]                          | $\sigma$ [Å]  | $\lambda$ [eV]                          |
| Carbon tetrachloride | 0.04 (0.0005) | $1\text{e}^{-13}$ ( $5\text{e}^{-8}$ )  | 0.015 (0.005) | $1\text{e}^{-13}$ ( $1\text{e}^{-13}$ ) |
| Dichloromethane      | 0.005 (0.005) | $1\text{e}^{-13}$ ( $1\text{e}^{-13}$ ) | 0.005 (0.005) | $1\text{e}^{-13}$ ( $1\text{e}^{-13}$ ) |
| Methanol             | 0.015 (0.001) | $1\text{e}^{-13}$ ( $1\text{e}^{-13}$ ) | 0.015 (0.001) | $1\text{e}^{-13}$ ( $1\text{e}^{-13}$ ) |

**Table S4** Mean absolute errors (MAE) and root mean square errors (RMSE) (normalized per atom) of leave-one-out cross-validation technique for each investigated target functional in each solvent, for both bound and separated (in parentheses) states, obtained using the hyperparameter combinations  $\sigma$  and  $\lambda$  listed in Table S3.

| method               | HSE06-D3(BJ)     |                   | PBE0-D3(BJ)      |                   |
|----------------------|------------------|-------------------|------------------|-------------------|
| solvent              | MAE/at.<br>[meV] | RMSE/at.<br>[meV] | MAE/at.<br>[meV] | RMSE/at.<br>[meV] |
| Carbon tetrachloride | 0.1819 (0.2063)  | 0.2391 (0.2575)   | 0.1871 (0.2121)  | 0.2462 (0.2628)   |
| Dichloromethane      | 0.2125 (0.2146)  | 0.2614 (0.2632)   | 0.2186 (0.2142)  | 0.2651 (0.2652)   |
| Methanol             | 0.2517 (0.2178)  | 0.3046 (0.2754)   | 0.2536 (0.2164)  | 0.3066 (0.2738)   |

The combinations of  $\sigma$  and  $\lambda$  values yielding the lowest prediction errors are summarized in Table S3. The optimal  $\lambda$ -HP values take on the value  $1\text{e}^{-13}$  eV in all cases, except in the case of separated state in  $\text{CCl}_4$  solvent computed with HSE06-D3(BJ) functional ( $5\text{e}^{-8}$  eV). The value  $1\text{e}^{-13}$  eV was the lowest tested. With each decrease in the  $\lambda$  value, the errors were reduced by a progressively smaller amount, the difference in error between  $\lambda = 1\text{e}^{-12}$  and  $\lambda = 1\text{e}^{-13}$  eV was on order of  $\sim 1\text{e}^{-12}$  eV/atom. This small  $\lambda$  value suggests that regularization is not required for these systems. The values of the  $\sigma$ -HP lie within a range from  $\sigma = 0.0005$  Å (for the HSE06-D3(BJ) in the separated state in  $\text{CCl}_4$  solvent) to  $\sigma = 0.04$  Å (HSE06-D3(BJ), bound state,  $\text{CCl}_4$ ).

To quantify prediction accuracy, we monitored the statistical indicators MAE (Mean Absolute Error) and RMSE (Root Mean Square Error). The resulting MAE and RMSE values obtained from optimized HPs are reported in Table S4. The MAE/atom and RMSE/atom values are the highest for  $\text{CH}_3\text{OH}$ , followed by  $\text{CH}_2\text{Cl}_2$  and the lowest for  $\text{CCl}_4$ , both in the bound and separated states for both hybrid functionals.

**Table S5** The charge transfer values calculated from Natural bond order (NBO) charges<sup>S2</sup> and charge model 5 (CM5)<sup>S3</sup> methods of TMTU...I<sub>2</sub> complex in various solvents calculated with implicit solvent models at PBE0-D3/def2-TZVPP level of theory.

| solvent              | COSMO  |        | SMD    |        | CPCM   |        |
|----------------------|--------|--------|--------|--------|--------|--------|
|                      | NBO    | CM5    | NBO    | CM5    | NBO    | CM5    |
| Carbon tetrachloride | -0.376 | -0.380 | -0.371 | -0.374 | -0.365 | -0.367 |
| Dichloromethane      | -0.506 | -0.514 | -0.483 | -0.491 | -0.472 | -0.479 |
| Methanol             | -0.555 | -0.564 | -0.525 | -0.535 | -0.510 | -0.518 |

**Table S6** The interaction energy,  $\Delta E$  (kcal/mol), Gibbs free energy,  $\Delta G$  (kcal/mol,  $T = 298$  K), halogen bond length,  $r$  (Å), and charge transfer ( $\text{CT}_1$ , calculated from Hirshfeld charges;  $\text{CT}_2$ , calculated from Löwdin charges) of TMTU...I<sub>2</sub> complex in various solvents calculated in COSMO solvent model at  $\omega\text{B97M-V/def2-TZVPP}$  level of theory.

| solvent              | $\Delta E$ | $\Delta G$ | $r$   | $\text{CT}_1/\text{CT}_2$ |
|----------------------|------------|------------|-------|---------------------------|
| Carbon tetrachloride | -11.94     | -0.21      | 2.724 | -0.292/-0.256             |
| Dichloromethane      | -12.97     | -1.15      | 2.610 | -0.521/-0.476             |
| Methanol             | -14.41     | -2.14      | 2.574 | -0.668/-0.610             |

**Table S7** The interaction energy ( $\Delta E$ ), Gibbs free energy ( $\Delta G_{calc.}$ ) (in kcal/mol, T = 298 K) and charge transfer (CT, calculated from Hirshfeld charges) of tetramethylurea...I<sub>2</sub> complex in various solvent media with COSMO solvent model calculated at PBE0-D3/def2-TZVPP level of theory. Experimental free energies<sup>S4</sup> are given for comparison.

| Solvent                   | $\epsilon$ | $\Delta E$ | $\Delta G_{calc.}$ | $\Delta G_{expt}^a$ | CT     |
|---------------------------|------------|------------|--------------------|---------------------|--------|
| <i>n</i> -Octane          | 1.94       | -9.65      | 0.29               | -1.47               | -0.193 |
| Carbon tetrachloride      | 2.23       | -9.59      | 0.37               | -1.06               | -0.200 |
| Toluene                   | 2.38       | -9.56      | 0.40               | -0.65               | -0.203 |
| Chloroform                | 4.81       | -9.37      | 0.65               | 0                   | -0.234 |
| 1,1,2,2-tetrachloroethane | 8.4        | -9.31      | 0.79               | ~ 0                 | -0.232 |
| Dichloromethane           | 8.93       | -9.30      | 0.80               | -0.41               | -0.253 |
| Acetone                   | 20.7       | -9.27      | 0.91               | ~ 0                 | -0.270 |
| Methanol                  | 32.61      | -9.26      | 0.94               | ~ 0                 | -0.27  |
| Acetonitrile              | 37.5       | -9.26      | 0.94               | ~ 0                 | -0.275 |

<sup>a</sup> From ref. S4

**Table S8** The relative free energy of various conformations TMTU...I<sub>2</sub> complex with 30 explicit solvent molecules in COSMO model calculated at PBE0-D3/def2-SVP level of theory.

| Solvent              |             | Relative free energy (kcal/mol) |                 |
|----------------------|-------------|---------------------------------|-----------------|
|                      |             | bound state                     | separated state |
| Carbon tetrachloride | conformer 1 | 0.0                             | 0.0             |
|                      | conformer 2 | 2.07                            | 0.92            |
|                      | conformer 3 | 4.24                            | 1.07            |
|                      | conformer 4 | 5.20                            | 5.14            |
|                      | conformer 5 | 7.72                            | 6.12            |
| Dichloromethane      | conformer 1 | 0.0                             | 0.0             |
|                      | conformer 2 | 0.88                            | 1.18            |
|                      | conformer 3 | 2.93                            | 2.40            |
|                      | conformer 4 | 3.42                            | 3.68            |
|                      | conformer 5 | 3.75                            | 4.37            |
| Methanol             | conformer 1 | 0.0                             | 0.0             |
|                      | conformer 2 | 1.21                            | 1.06            |
|                      | conformer 3 | 2.14                            | 4.99            |
|                      | conformer 4 | 8.46                            | 7.92            |
|                      | conformer 5 | 10.36                           | 9.97            |

**Table S9** The relative free energy of various conformations TMTU...I<sub>2</sub> complex with 50 explicit solvent molecules calculated at PBE0-D3/def2-TZVPP:PM7 level of theory.

| Solvent | Relative free energy (kcal/mol) |
|---------|---------------------------------|
|---------|---------------------------------|

|                      |             | bound state | separated state |
|----------------------|-------------|-------------|-----------------|
| Carbon tetrachloride | conformer 1 | 0.0         | 0.0             |
|                      | conformer 2 | 1.67        | 3.26            |
|                      | conformer 3 | 2.80        | 7.76            |
|                      | conformer 4 | 6.60        | 7.76            |
|                      | conformer 5 | 7.47        | 12.19           |
| Dichloromethane      | conformer 1 | 0.0         | 0.0             |
|                      | conformer 2 | 7.71        | 2.93            |
|                      | conformer 3 | 12.55       | 12.36           |
|                      | conformer 4 | 12.64       | 15.27           |
|                      | conformer 5 | 14.41       | 16.70           |
| Methanol             | conformer 1 | 0.0         | 0.0             |
|                      | conformer 2 | 1.10        | 5.63            |
|                      | conformer 3 | 1.33        | 6.58            |
|                      | conformer 4 | 5.24        | 8.98            |
|                      | conformer 5 | 9.20        | 9.88            |

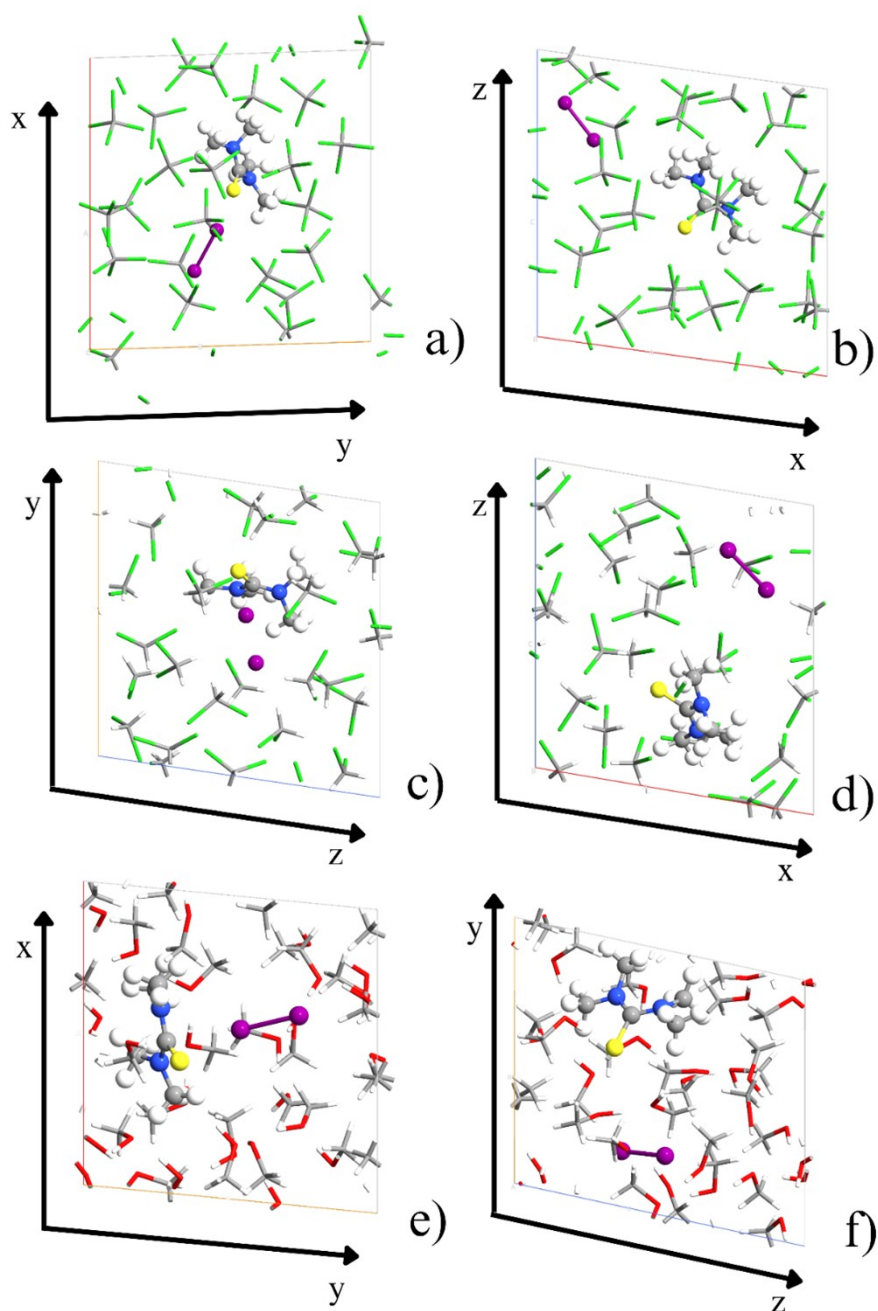

**Fig. S1** Periodic models of tetramethylthiourea with an iodine molecule in  $\text{CCl}_4$  (a,b),  $\text{CH}_2\text{Cl}_2$  (c,d), and  $\text{CH}_3\text{OH}$  (e,f). The structures of the solvent molecules are simple. Each system was studied both as a complex (a, c, e) and as separated fragments (b, d, f). [C: grey, I: violet, N: blue, H: white, S: yellow, O: red]

## References

- S1 M. Stone, *J. R. Stat. Soc. Ser. B Stat. Methodol.* 1974, **36**, 111–133.  
 S2 A. E. Reed, L. A. Curtiss, F. Weinhold, *Chem. Rev.* 1988, **88**, 899–926.

- S3 A. V. Marenich, S. V. Jerome, C. J. Cramer, D. G. Truhlar, *J. Chem. Theory Comput.* 2012, **8**, 527–541.
- S2 C. C. Robertson, R. N. Perutz, L. Brammer and C. A. Hunter, *Chem Sci* 2014, **5**, 4179–4183.
